# Supplementary material for: M2-Macrophage-Induced Chronic Inflammation Promotes Reversible Mesenchymal Stromal Cell Senescence and Reduces Their Anti-Fibrotic Properties
Source: MDPI journal article supplement (doi:10.3390/ijms242317089), 2023-12-04
Supplement: s1 [file s1]

Supplement 1.

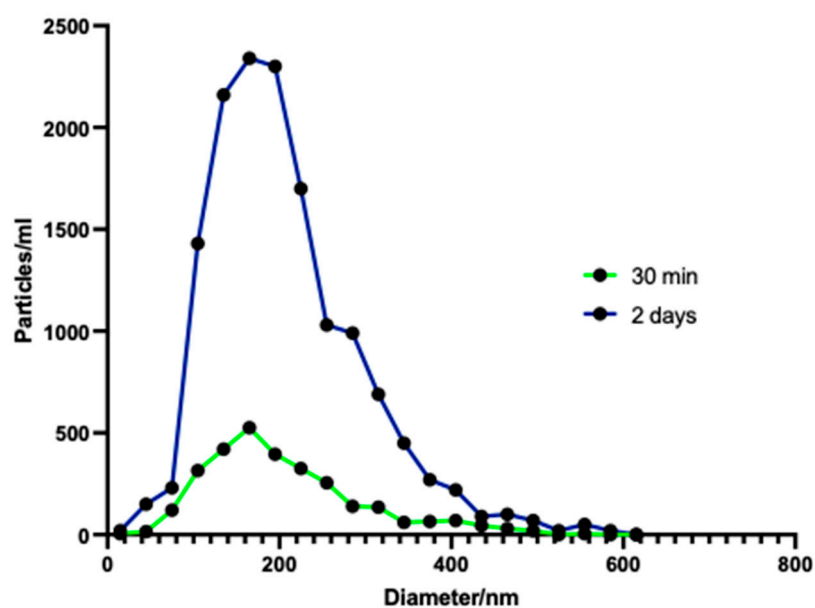

|                             |                     |
|-----------------------------|---------------------|
| Characteristic              | EVs MSCs            |
| Concentration, particles/ml | 4,2x10 <sup>8</sup> |
| Peak size, nm               | 174,4               |
| Mean size, nm               | 211,3               |

Figure S1. MSC-EV characteristics by NTA.
